# Supplementary material for: Circulating Proteins Associated with Response and Resistance to Neoadjuvant Chemotherapy in HER2-Positive Breast Cancer
Source: MDPI journal article supplement (doi:10.3390/cancers14041087), 2022-02-21
Supplement: s1 [file s1]

## ANNEXES

### ANNEXE 1. Criteria for HER2-targeted NAC in HER2-positive BC patients

#### - Inclusion criteria

1. Women with ages  $\geq 18$  years with early high-risk or locally advanced BC (T1cN1; T2N1; T2N0; T3N0) (stage III according to AJCC) suitable for neoadjuvant treatment.
2. Histologically confirmed unilateral invasive BC.
3. HER2 positive disease according to the 2013 ASCO/CAP guidelines [defined as IHC 3+ or positive ISH (by gene copy number or HER2/CEP17 gene ratio of 2 or more)].
4. Known estrogen receptor (ER) and progesterone receptor (PgR).
5. The availability of a representative Formalin-Fixed Paraffin-Embedded (FFPE) tumor block taken at the diagnostic biopsy for central confirmation of HER2 eligibility, for evaluation of ER, PgR, Ki67, and for evaluation of biomarkers is mandatory. Note: The diagnostic biopsy of the breast lesion may have been taken prior to the required screening procedures. If a diagnostic sentinel node biopsy is performed, an FFPE block should be available. An FFPE tumor block is also mandatory after the first cycle of therapy. Surgical tissue (residual tumor or tumor bed in the case of CRP and axillary lymph node material) is also mandatory.
6. Informed consent for the mandatory collection of blood samples before starting neoadjuvant treatment, after the first cycle of therapy, at the end of neoadjuvant treatment (before surgery), 6 months after surgery and at the end of all treatments.
7. ECOG performance status 0 or 1
8. For women who are not postmenopausal ( $\geq 12$  months of non-therapy-induced amenorrhea) or surgically sterile (absence of ovaries and / or uterus): agreement to maintain abstinence or to use single or combined contraceptive methods that result in a failure rate of  $<1\%$  per year during the treatment period and for at least 6 months after the last dose of study drugs. Abstinence is only acceptable if it is consistent with the patient's preferred and usual lifestyle. Periodic abstinence (for example, calendar, ovulation, symptothermic, or post-ovulation methods) and abstinence are not acceptable contraceptive methods. Examples of contraceptive methods with a failure rate of  $<1\%$  per year include tubal ligation, male sterilization, hormonal implants, established and appropriate use of combined oral or injected hormonal contraceptives, and certain intrauterine devices. Alternatively, two methods can be combined (eg, two barrier methods such as a condom and a cervical cap) to achieve a failure rate of  $<1\%$  per year. Barrier methods should always be supplemented with the use of a spermicide.
9. Written informed consent to participate in the trial (approved by the Independent Ethics Committee [CEIC]) obtained prior to any study-specific selection procedure.
10. Willing and able to comply with protocol.

#### - Exclusion criteria

1. Evidence of bilateral BC or metastatic disease (M1).
2. HER2 negative patients defined as 0-1+ by immunohistochemistry or 2+ by immunohistochemistry without HER2 amplification by in situ hybridization (ISH) or other amplification tests performed locally are not considered eligible for study.
3. Pregnant or lactating women. Documentation of a negative pregnancy test should be available for premenopausal women with intact reproductive organs and for women less than a year after the last menstrual cycle.
4. Women of childbearing potential, unless (1) they are surgically sterile or (2) use adequate contraceptive measures, for example, abstinence, an intrauterine device, or a double barrier method of contraception.
5. Previous treatment with chemotherapy, hormone therapy, or an investigational drug for any type of malignancy.
6. Investigational pretreatment for any non-malignant condition within 4 weeks of the randomization date.
7. Administration of a live attenuated vaccine within 4 weeks prior to day 1 or anticipation that such live attenuated vaccine will be needed during the study.
8. Previous or concomitant malignancy of any other type that could affect compliance with the protocol or interpretation of results. Patients with curatively treated basal cell carcinoma of the skin or cervical cancer in situ are generally eligible.
9. Pre-existing motor or sensory neuropathy grade  $> 1$  for any reason.
10. History of allergic, anaphylactic, or other hypersensitivity reactions to chimeric or humanized antibodies or fusion proteins.
11. Patients with previous transplantation of allogeneic stem cells or solid organs.

12. Known clinically significant liver disease, including viral, alcoholic, or other active hepatitis, cirrhosis, fatty liver, and inherited liver disease.

13. History of HIV infection, active hepatitis B (chronic or acute), or hepatitis C infection. Patients with past or resolved hepatitis B infection (defined as a negative HBsAg test and a hepatitis B central antigen test [anti-HBc] positive) are eligible. Hepatitis C virus (HCV) antibody positive patients are eligible only if the polymerase chain reaction (PCR) assay is negative for HCV RNA.

14. Active tuberculosis.

15. Serious infections within 4 weeks of day 1, including but not limited to hospitalization for complications of infection, bacteremia, or severe pneumonia. Signs or symptoms of significant infection in the 2 weeks prior to day 1.

16. Received oral or intravenous antibiotics in the 2 weeks prior to Cycle 1 Day 1.

17. Other serious medical illness or condition including: a history of documented congestive heart failure; New York Heart Association (NYHA) CHF Class II or higher; angina pectoris requiring antianginal medication or unstable angina in the 6 months prior to Day 1; evidence of transmural infarction on ECG; myocardial infarction stroke or transient ischemic attack (TIA) in the 6 months prior to day 1; poorly controlled hypertension (eg, systolic > 180 mm Hg or diastolic > 100 mm Hg; however, patients with well-controlled hypertension on medication are eligible); clinically significant valvular heart disease; high-risk uncontrolled arrhythmias.

18. Patients with a history of uncontrolled seizures, central nervous system disorders, or psychiatric disability that the investigator deems clinically important and that prevents informed consent or adversely affects compliance with study drugs.

19. Serious uncontrolled infections (bacterial or viral) or poorly controlled diabetes mellitus.

20. Any of the following abnormal baseline hematology values:

- a. White blood cell count (WBC)  $<2.5 \times 10^9 / L$
- b. Absolute Neutrophil Count (ANC)  $<1.5 \times 10^9 / L$
- c. Lymphocyte count  $<0.5 \times 10^9 / L$
- d. Platelet count  $<100 \times 10^9 / L$
- e. Hemoglobin (Hb)  $<10 \text{ g} / dL$

21. Any of the following abnormal reference laboratory tests:

- a. Total serum bilirubin  $>1.5 \times \text{ULN}$  (upper limit of normal) (except for patients with clearly documented Gilbert syndrome)
- b. Alanine transaminase (ALT) or aspartate transaminase (AST)  $>1.25 \times \text{ULN}$
- c. to. Alkaline phosphatase  $>2.5 \times \text{ULN}$
- d. Serum creatinine  $>1.5 \times \text{ULN}$
- e. INR and aPTT  $>1.5 \times \text{ULN}$  in the 2 weeks prior to enrollment. This applies only to patients who are not receiving therapeutic anticoagulation; patients receiving therapeutic anticoagulation should receive a stable dose.

22. Baseline left ventricular ejection fraction (LVEF)  $<50\%$  by echocardiography or multigrade scintigraphy (MUGA).

23. Major surgical procedure within 28 days prior to Day 1 or anticipation of the need for a major surgical procedure during the course of the study.

24. Flu vaccination should only be given during flu season (approximately October through March). Patients should not receive the live, attenuated influenza vaccine (e.g. FluMist®) within 4 weeks prior to Day 1 or at any time during the study.

## ANNEXE 2. *Synthesis of inorganic nanoparticles*

### *Synthesis of citrate-gold nanoparticles*

AuNPs ( $10.02 \pm 0.91$  nm) were synthesized by the citrate reduction method in aqueous solution [47]. Briefly, 60 ml of sodium citrate tribasic solution (0.075% w/v) was heated to 100 °C, and then gold was added as 54  $\mu$ L of 10% w/v of hydrogen tetrachloroaurate (III) hydrate solution. The reaction mixture was kept under refluxing until a deep red color was detected. Solution of nanoparticles is chilled at room temperature and stored at 4 °C for a maximum of one month.

and

### *Synthesis of citrate-capped platinum nanoparticles*

PtNPs ( $2.40 \pm 0.30$  nm) were synthesized by the method previously described [47]. Glass wares were cleaned in aqua regia and all solutions were prepared using double distilled water. The synthesis of PtNPs was performed in a glass ware with the magnetic stir. Aqueous solutions of  $\text{H}_2\text{PtCl}_6$  (1 mL, 16 mM) and trisodium citrate (1 mL, 40 mM) were mixed with 38 mL water and stirred for 30 min at room temperature. Subsequently,  $\text{NaBH}_4$  (200  $\mu$ L, 50 mM) was added dropwise into the mixture. The colorless reactant mixture immediately turned into brownish yellow. Finally, the mixture was allowed to react and stirred at ambient temperature for 1 h.

| AuNPs@citrate (nm) |       |    |       |
|--------------------|-------|----|-------|
| 1                  | 7.94  | 21 | 10.35 |
| 2                  | 8.37  | 22 | 10.38 |
| 3                  | 8.38  | 23 | 10.41 |
| 4                  | 8.60  | 24 | 10.44 |
| 5                  | 8.78  | 25 | 10.56 |
| 6                  | 8.78  | 26 | 10.65 |
| 7                  | 8.87  | 27 | 10.65 |
| 8                  | 9.17  | 28 | 10.68 |
| 9                  | 9.19  | 29 | 10.80 |
| 10                 | 9.41  | 30 | 10.81 |
| 11                 | 9.49  | 31 | 10.83 |
| 12                 | 9.49  | 32 | 10.85 |
| 13                 | 9.55  | 33 | 10.86 |
| 14                 | 9.62  | 34 | 10.86 |
| 15                 | 9.82  | 35 | 10.88 |
| 16                 | 9.84  | 36 | 10.95 |
| 17                 | 9.89  | 37 | 10.96 |
| 18                 | 9.89  | 38 | 10.99 |
| 19                 | 9.99  | 39 | 11.48 |
| 20                 | 10.03 | 40 | 11.50 |
| Count              | 40    |    |       |
| Mean               | 10.02 |    |       |
| Minimum            | 7.94  |    |       |
| Maximum            | 11.50 |    |       |
| Standar Deviation  | 0.91  |    |       |

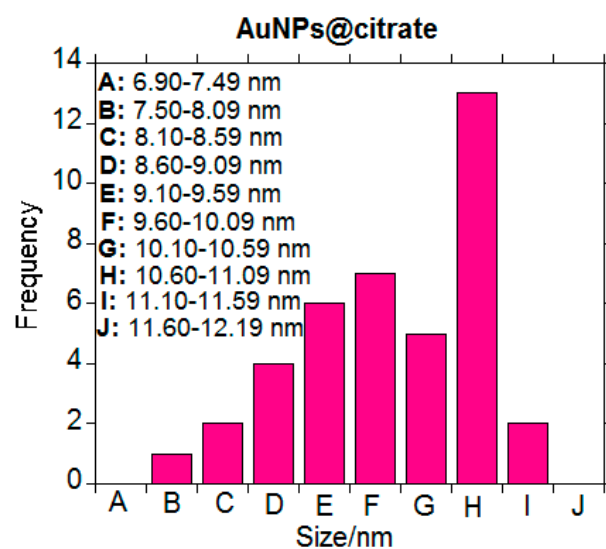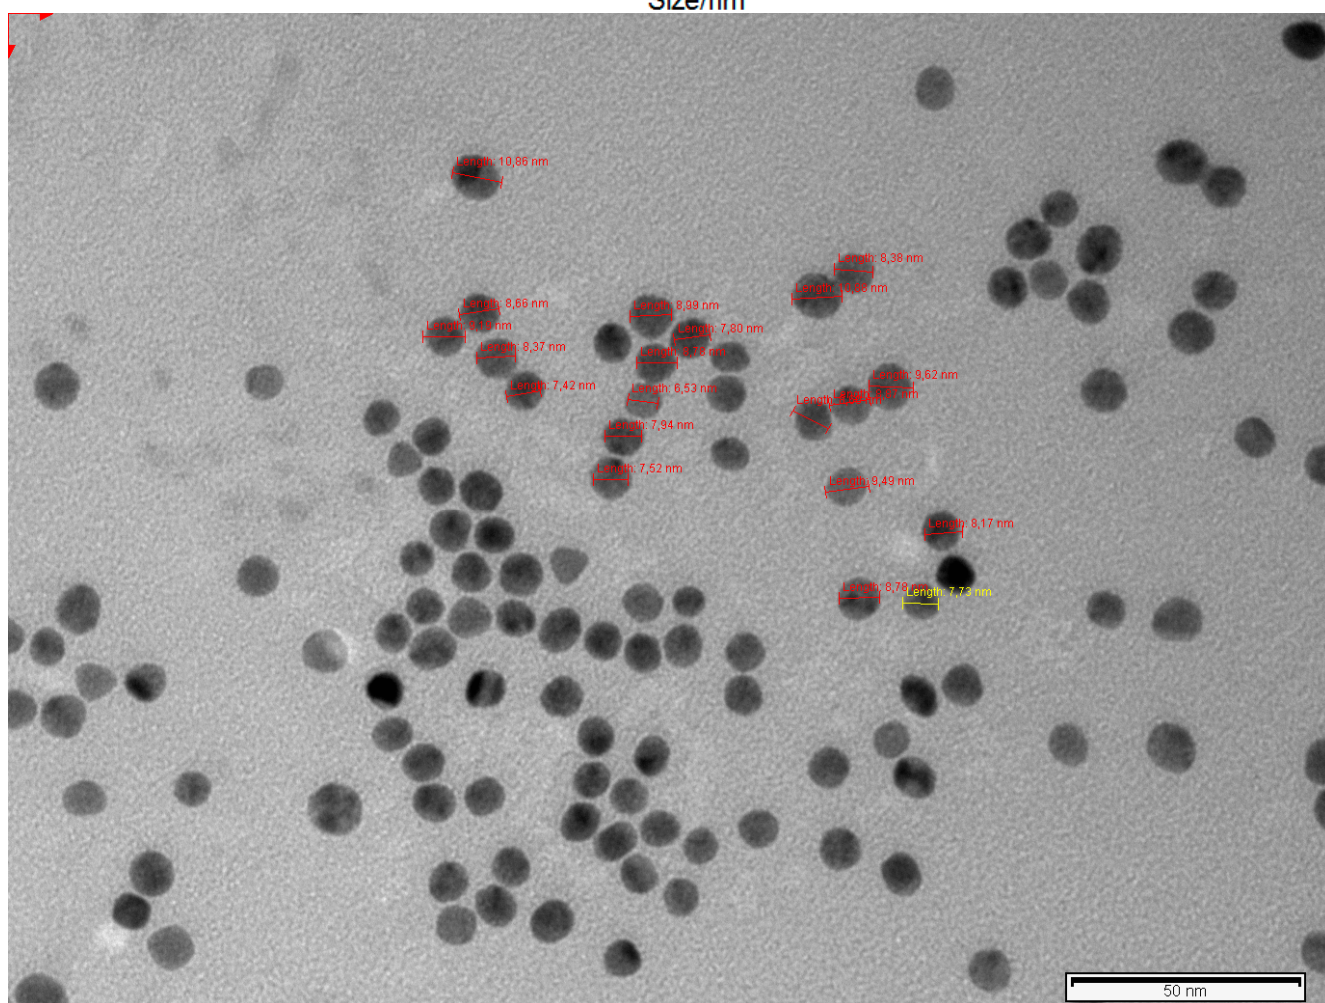

**Figure S1.** TEM image of AuNPs@citrate in aqueous phase and the characterization data.

| PtNPs@citrate (nm) |      |    |      |
|--------------------|------|----|------|
| 1                  | 2.02 | 21 | 2.31 |
| 2                  | 2.02 | 22 | 2.32 |
| 3                  | 2.03 | 23 | 2.38 |
| 4                  | 2.05 | 24 | 2.42 |
| 5                  | 2.08 | 25 | 2.50 |
| 6                  | 2.10 | 26 | 2.51 |
| 7                  | 2.16 | 27 | 2.54 |
| 8                  | 2.16 | 28 | 2.57 |
| 9                  | 2.16 | 29 | 2.58 |
| 10                 | 2.16 | 30 | 2.68 |
| 11                 | 2.17 | 31 | 2.69 |
| 12                 | 2.17 | 32 | 2.70 |
| 13                 | 2.17 | 33 | 2.75 |
| 14                 | 2.17 | 34 | 2.80 |
| 15                 | 2.17 | 35 | 2.83 |
| 16                 | 2.18 | 36 | 2.83 |
| 17                 | 2.18 | 37 | 2.89 |
| 18                 | 2.22 | 38 | 2.94 |
| 19                 | 2.23 | 39 | 2.99 |
| 20                 | 2.23 | 40 | 3.00 |
| Count              | 40   |    |      |
| Mean               | 2.40 |    |      |
| Minimum            | 2.02 |    |      |
| Maximum            | 3.00 |    |      |
| Standar Deviation  | 0.30 |    |      |

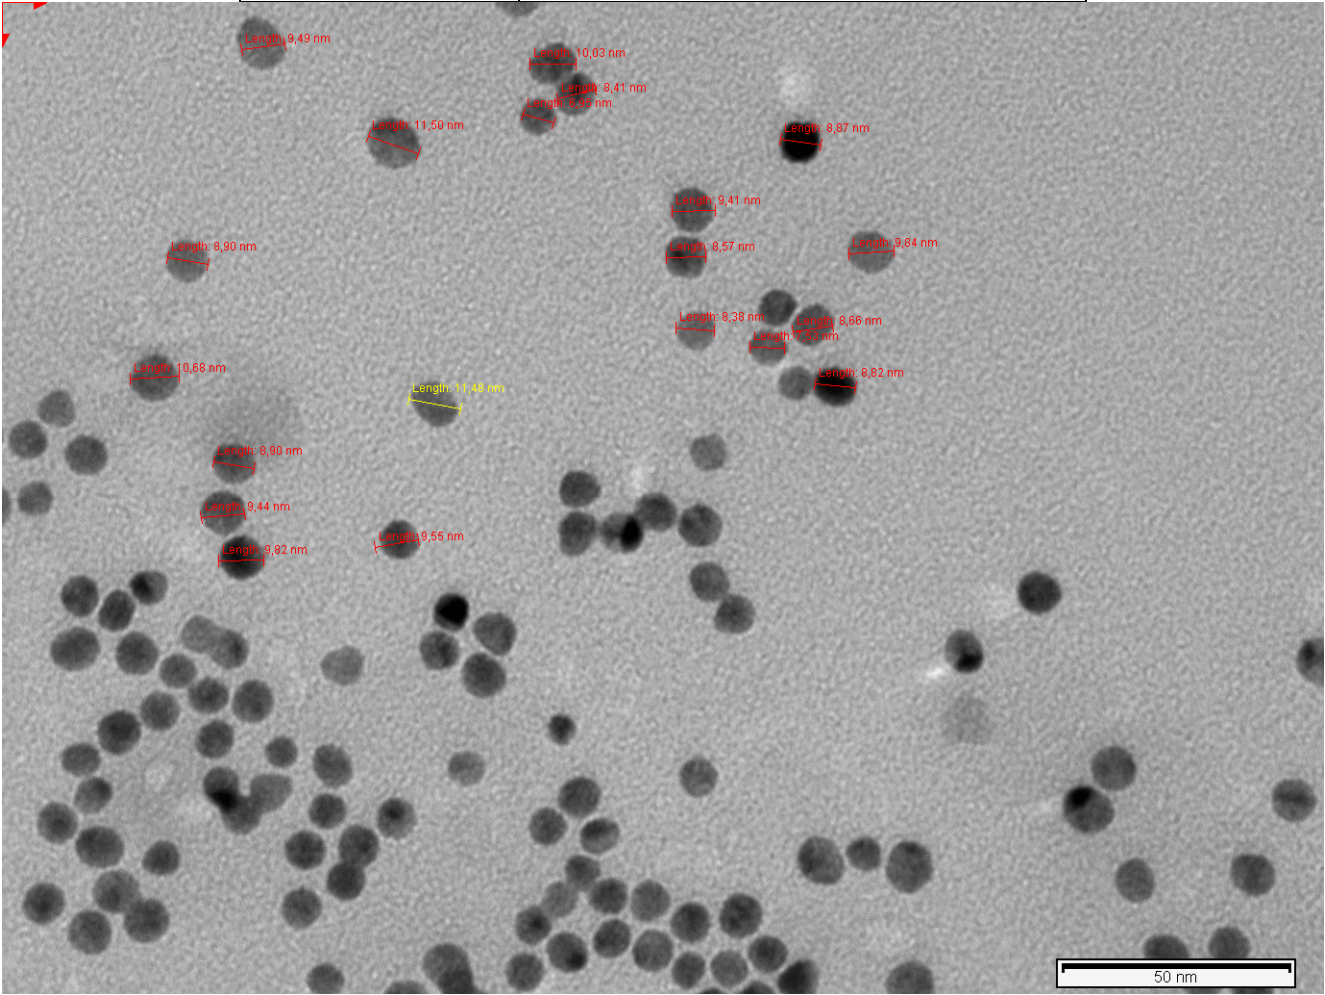



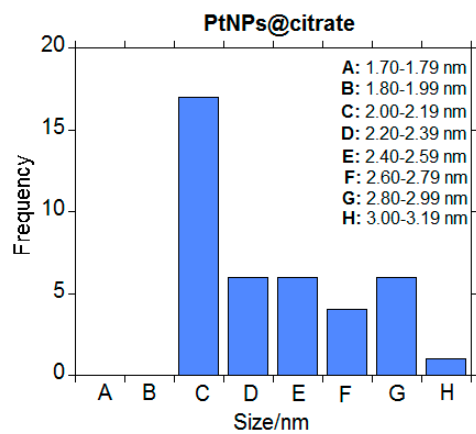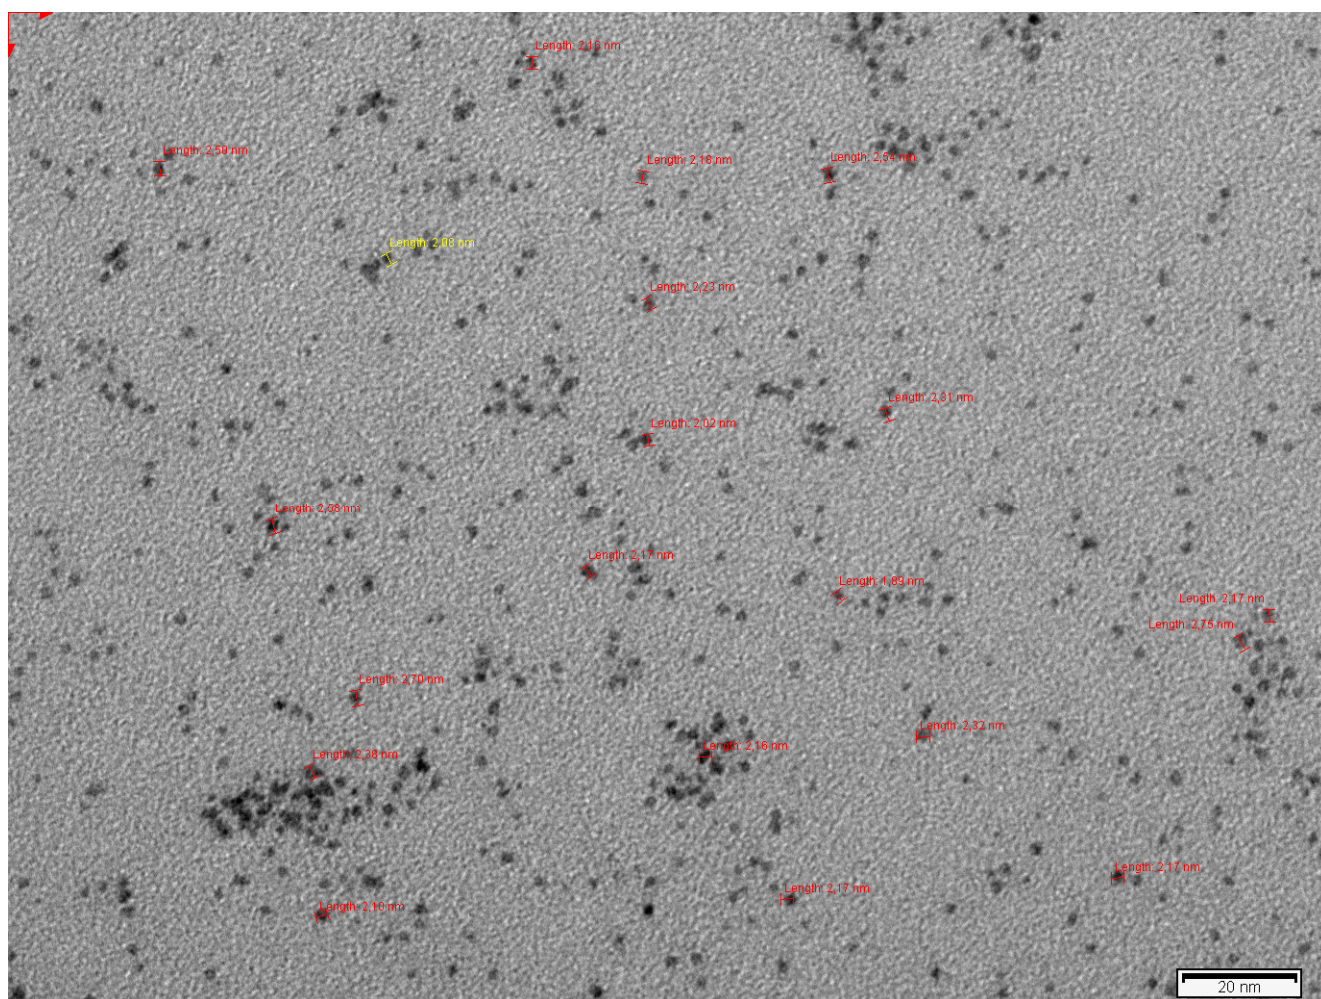

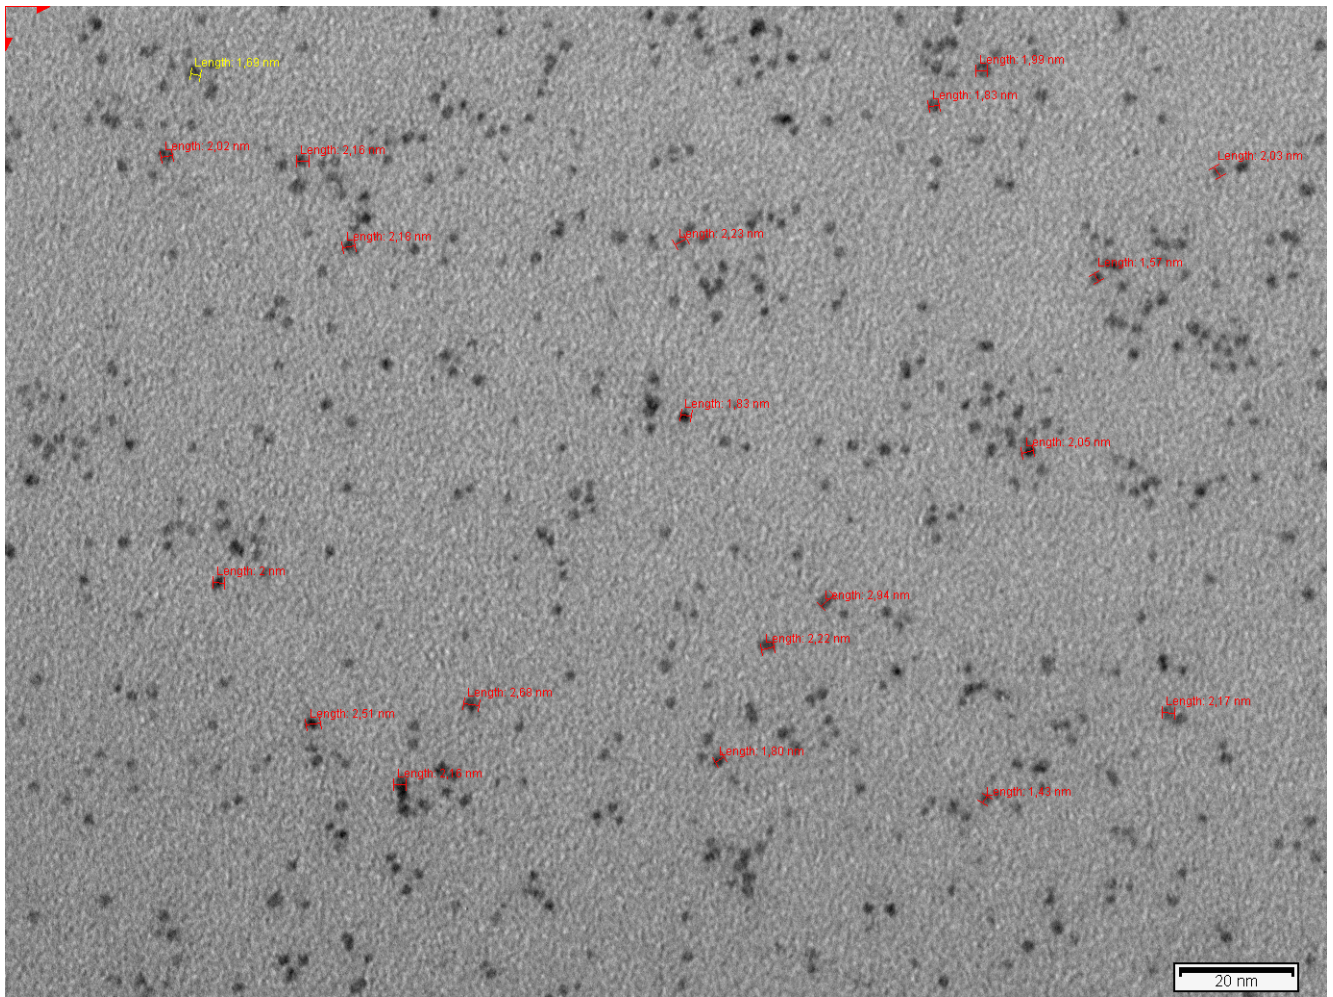

**Figure S2.** TEM image of PtNPs@citrate in aqueous phase and the characterization data.

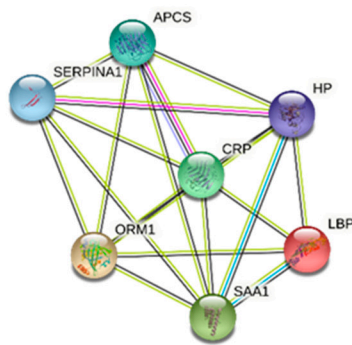

**Figure S3.** Cluster of acute-phase response proteins found in the protein-protein interaction network map of the genes encoded differentially regulated proteins for the responders patients found after the proteomic analysis of the serum samples (**method 1**).



**Table S1.** Proteins identified in the crude serum samples (**method 1**) belonging to HER2-positive BC patients that were obtained before starting the neoadjuvant treatment. These patients showed different response after the NAT treatment: responders ( $n = 6$ ), non-responders ( $n = 4$ ). The accession number, gene name and species (Human) were reported.

| Protein Name                          | UniProt Name | Entry Name  | Gene      | Responders | Non-responders |
|---------------------------------------|--------------|-------------|-----------|------------|----------------|
| Complement component C8 gamma chain   | P07360       | CO8G_HUMAN  | C8G       | X          |                |
| Immunoglobulin lambda variable 9-49   | A0A0B4J1Y8   | LV949_HUMAN | IGLV9-49  | X          |                |
| Complement component C8 beta chain    | P07358       | CO8B_HUMAN  | C8B       | X          |                |
| Prenylcysteine oxidase 1              | Q9UHG3       | PCYOX_HUMAN | PCYOX1    | X          |                |
| Fibrinogen alpha chain                | P02671       | FIBA_HUMAN  | FGA       | X          |                |
| Immunoglobulin lambda variable 3-19   | P01714       | LV319_HUMAN | IGLV3-19  | X          |                |
| Serum amyloid A-1 protein             | P0DJJ8       | SAA1_HUMAN  | SAA1      | X          |                |
| Complement component C9               | P02748       | CO9_HUMAN   | C9        | X          |                |
| Immunoglobulin lambda variable 4-69   | A0A075B6H9   | LV469_HUMAN | IGLV4-69  | X          |                |
| Immunoglobulin kappa variable 1D-39   | P04432       | KVD39_HUMAN | IGKV1D-39 | X          |                |
| Immunoglobulin kappa variable 1-17    | P01599       | KV117_HUMAN | IGKV1-17  | X          |                |
| Pregnancy zone protein                | P20742       | PZP_HUMAN   | PZP       |            | X              |
| Hyaluronan-binding protein 2          | Q14520       | HABP2_HUMAN | HABP2     |            | X              |
| Immunoglobulin lambda variable 7-43   | P04211       | LV743_HUMAN | IGLV7-43  |            | X              |
| Immunoglobulin lambda variable 2-11   | P01706       | LV211_HUMAN | IGLV2-11  |            | X              |
| Immunoglobulin kappa variable 2-30    | P06310       | KV230_HUMAN | IGKV2-30  |            | X              |
| Properdin                             | P27918       | PROP_HUMAN  | CFP       |            | X              |
| Immunoglobulin lambda variable 1-40   | P01703       | LV140_HUMAN | IGLV1-40  |            | X              |
| Complement C1q subcomponent subunit A | P02745       | C1QA_HUMAN  | C1QA      |            | X              |
| Coagulation factor X                  | P00742       | FA10_HUMAN  | F10       |            | X              |
| Immunoglobulin heavy variable 3-64D   | A0A0J9YX35   | HV64D_HUMAN | IGHV3-64D |            | X              |
| Complement factor H-related protein 1 | Q03591       | FHR1_HUMAN  | CFHR1     |            | X              |
| Transferrin receptor protein 1        | P02786       | TFR1_HUMAN  | TFRC      |            | X              |
| Immunoglobulin kappa variable 1-5     | P01602       | KV105_HUMAN | IGKV1-5   |            | X              |
| Complement factor H-related protein 2 | P36980       | FHR2_HUMAN  | CFHR2     |            | X              |
| Hemoglobin subunit delta              | P02042       | HBD_HUMAN   | HBD       |            | X              |
| Immunoglobulin heavy constant alpha 2 | P01877       | IGHA2_HUMAN | IGHA2     |            | X              |
| Immunoglobulin lambda variable 8-61   | A0A075B6I0   | LV861_HUMAN | IGLV8-61  |            | X              |
| Immunoglobulin heavy variable 4-28    | A0A0C4DH34   | HV428_HUMAN | IGHV4-28  |            | X              |



|                                              |            |             |          |   |   |
|----------------------------------------------|------------|-------------|----------|---|---|
| Immunoglobulin kappa variable 1-27           | A0A075B6S5 | KV127_HUMAN | IGKV1-27 |   | X |
| Beta-2-microglobulin                         | P61769     | B2MG_HUMAN  | B2M      |   | X |
| Apolipoprotein C-III                         | P02656     | APOC3_HUMAN | APOC3    | X | X |
| Serum paraoxonase/ arylesterase 1            | P27169     | PON1_HUMAN  | PON1     | X | X |
| Immunoglobulin heavy constant gamma 1        | P01857     | IGHG1_HUMAN | IGHG1    | X | X |
| Immunoglobulin heavy variable 5-51           | A0A0C4DH38 | HV551_HUMAN | IGHV5-51 | X | X |
| Inter-alpha-trypsin inhibitor heavy chain H3 | Q06033     | ITIH3_HUMAN | ITIH3    | X | X |
| Carboxypeptidase N catalytic chain           | P15169     | CBPN_HUMAN  | CPN1     | X | X |
| Immunoglobulin kappa variable 1-33           | P01594     | KV133_HUMAN | IGKV1-33 | X | X |
| Kininogen-1                                  | P01042     | KNG1_HUMAN  | KNG1     | X | X |
| C4b-binding protein beta chain               | P20851     | C4BPB_HUMAN | C4BPB    | X | X |
| Plasma serine protease inhibitor             | P05154     | IPSP_HUMAN  | SERPINA5 | X | X |
| Plasma protease C1 inhibitor                 | P05155     | IC1_HUMAN   | SERPING1 | X | X |
| Alpha-1B-glycoprotein                        | P04217     | A1BG_HUMAN  | A1BG     | X | X |
| Angiotensinogen                              | P01019     | ANGT_HUMAN  | AGT      | X | X |
| Inter-alpha-trypsin inhibitor heavy chain H2 | P19823     | ITIH2_HUMAN | ITIH2    | X | X |
| Immunoglobulin heavy constant gamma 2        | P01859     | IGHG2_HUMAN | IGHG2    | X | X |
| Immunoglobulin heavy constant gamma 3        | P01860     | IGHG3_HUMAN | IGHG3    | X | X |
| Vitronectin                                  | P04004     | VTNC_HUMAN  | VTN      | X | X |
| Immunoglobulin lambda-like polypeptide 5     | B9A064     | IGLL5_HUMAN | IGLL5    | X | X |
| Glutathione peroxidase 3                     | P22352     | GPX3_HUMAN  | GPX3     | X | X |
| Vitamin D-binding protein                    | P02774     | VTDB_HUMAN  | GC       | X | X |
| Inter-alpha-trypsin inhibitor heavy chain H1 | P19827     | ITIH1_HUMAN | ITIH1    | X | X |
| Complement C1q subcomponent subunit C        | P02747     | C1QC_HUMAN  | C1QC     | X | X |
| Ceruloplasmin                                | P00450     | CERU_HUMAN  | CP       | X | X |
| Immunoglobulin kappa variable 4-1            | P06312     | KV401_HUMAN | IGKV4-1  | X | X |
| Immunoglobulin kappa variable 3-20           | P01619     | KV320_HUMAN | IGKV3-20 | X | X |
| Antithrombin-III                             | P01008     | ANT3_HUMAN  | SERPINC1 | X | X |
| Hemoglobin subunit beta                      | P68871     | HBB_HUMAN   | HBB      | X | X |
| Apolipoprotein A-I                           | P02647     | APOA1_HUMAN | APOA1    | X | X |
| Fibronectin                                  | P02751     | FINC_HUMAN  | FN1      | X | X |
| Complement C2                                | P06681     | CO2_HUMAN   | C2       | X | X |
| Serum amyloid P-component                    | P02743     | SAMP_HUMAN  | APCS     | X | X |

|                                                                           |            |             |          |   |   |
|---------------------------------------------------------------------------|------------|-------------|----------|---|---|
| Cholinesterase                                                            | P06276     | CHLE_HUMAN  | BCHE     | X | X |
| Hemopexin                                                                 | P02790     | HEMO_HUMAN  | HPX      | X | X |
| Platelet basic protein                                                    | P02775     | CXCL7_HUMAN | PPBP     | X | X |
| Immunoglobulin heavy variable 3-13                                        | P01766     | HV313_HUMAN | IGHV3-13 | X | X |
| Immunoglobulin heavy variable 3-15                                        | A0A0B4J1V0 | HV315_HUMAN | IGHV3-15 | X | X |
| Apolipoprotein E                                                          | P02649     | APOE_HUMAN  | APOE     | X | X |
| Immunoglobulin heavy constant alpha 1                                     | P01876     | IGHA1_HUMAN | IGHA1    | X | X |
| Beta-Ala-His dipeptidase                                                  | Q96KN2     | CNDP1_HUMAN | CNDP1    | X | X |
| N-acetylmuramoyl-L-alanine amidase                                        | Q96PD5     | PGRP2_HUMAN | PGLYRP2  | X | X |
| Haptoglobin                                                               | P00738     | HPT_HUMAN   | HPT      | X | X |
| Immunoglobulin heavy variable 3-49                                        | A0A0A0MS15 | HV349_HUMAN | IGHV3-49 | X | X |
| Alpha-2-macroglobulin                                                     | P01023     | A2MG_HUMAN  | A2M      | X | X |
| Immunoglobulin J chain                                                    | P01591     | IGJ_HUMAN   | JCHAIN   | X | X |
| Apolipoprotein C-I                                                        | P02654     | APOC1_HUMAN | APOC1    | X | X |
| CD5 antigen-like                                                          | O43866     | CD5L_HUMAN  | CD5L     | X | X |
| Attractin                                                                 | O75882     | ATRN_HUMAN  | ATRN     | X | X |
| Apolipoprotein C-II                                                       | P02655     | APOC2_HUMAN | APOC2    | X | X |
| Vitamin K-dependent protein S                                             | P07225     | PROS_HUMAN  | PROS1    | X | X |
| Zinc-alpha-2-glycoprotein                                                 | P25311     | ZA2G_HUMAN  | AZGP1    | X | X |
| Gelsolin                                                                  | P06396     | GELS_HUMAN  | GSN      | X | X |
| Immunoglobulin heavy constant mu                                          | P01871     | IGHM_HUMAN  | IGHM     | X | X |
| Afamin                                                                    | P43652     | AFAM_HUMAN  | AFM      | X | X |
| Serotransferrin                                                           | P02787     | TRFE_HUMAN  | TF       | X | X |
| Insulin-like growth factor-binding protein complex<br>acid labile subunit | P35858     | ALS_HUMAN   | IGFALS   | X | X |
| Clusterin                                                                 | P10909     | CLUS_HUMAN  | CLU      | X | X |
| Immunoglobulin heavy variable 3-7                                         | P01780     | HV307_HUMAN | IGHV3-7  | X | X |
| Tetranectin                                                               | P05452     | TETN_HUMAN  | CLEC3B   | X | X |
| Kallistatin                                                               | P29622     | KAIN_HUMAN  | SERPINA4 | X | X |
| Lumican                                                                   | P51884     | LUM_HUMAN   | LUM      | X | X |
| Alpha-2-antiplasmin                                                       | P08697     | A2AP_HUMAN  | SERPINF2 | X | X |
| Immunoglobulin kappa variable 3-11                                        | P04433     | KV311_HUMAN | IGKV3-11 | X | X |
| Plasminogen                                                               | P00747     | PLMN_HUMAN  | PLG      | X | X |
| Thyroxine-binding globulin                                                | P05543     | THBG_HUMAN  | SERPINA7 | X | X |

|                                              |            |             |          |   |   |
|----------------------------------------------|------------|-------------|----------|---|---|
| Transthyretin                                | P02766     | TTHY_HUMAN  | TTR      | X | X |
| Carboxypeptidase N subunit 2                 | P22792     | CPN2_HUMAN  | CPN2     | X | X |
| Ficolin-3                                    | O75636     | FCN3_HUMAN  | FCN3     | X | X |
| Adiponectin                                  | Q15848     | ADIPO_HUMAN | ADIPOQ   | X | X |
| Complement factor H                          | P08603     | CFAH_HUMAN  | CFH      | X | X |
| Alpha-1-antichymotrypsin                     | P01011     | AACT_HUMAN  | SERPINA3 | X | X |
| Sex hormone-binding globulin                 | P04278     | SHBG_HUMAN  | SHBG     | X | X |
| Albumin                                      | P02768     | ALBU_HUMAN  | ALB      | X | X |
| Complement factor B                          | P00751     | CFAB_HUMAN  | CFB      | X | X |
| Sulfhydryl oxidase 1                         | O00391     | QSOX1_HUMAN | QSOX1    | X | X |
| Inter-alpha-trypsin inhibitor heavy chain H4 | Q14624     | ITIH4_HUMAN | ITIH4    | X | X |
| Coagulation factor V                         | P12259     | FA5_HUMAN   | F5       | X | X |
| Complement C4-A                              | P0C0L4     | CO4A_HUMAN  | C4A      | X | X |
| Pigment epithelium-derived factor            | P36955     | PEDF_HUMAN  | SERPINF1 | X | X |
| Immunoglobulin kappa variable 2-24           | A0A0C4DH68 | KV224_HUMAN | IGKV2-24 | X | X |
| Phosphatidylcholine-sterol acyltransferase   | P04180     | LCAT_HUMAN  | LCAT     | X | X |
| Immunoglobulin heavy variable 3-72           | A0A0B4J1Y9 | HV372_HUMAN | IGHV3-72 | X | X |
| Alpha-1-antitrypsin                          | P01009     | A1AT_HUMAN  | SERPINA1 | X | X |
| Retinol-binding protein 4                    | P02753     | RET4_HUMAN  | RBP4     | X | X |
| Complement C1q subcomponent subunit B        | P02746     | C1QB_HUMAN  | C1QB     | X | X |
| C4b-binding protein alpha chain              | P04003     | C4BPA_HUMAN | C4BPA    | X | X |
| Complement C1r subcomponent-like protein     | Q9NZP8     | C1RL_HUMAN  | C1RL     | X | X |
| Alpha-1-acid glycoprotein 1                  | P02763     | A1AG1_HUMAN | ORM1     | X | X |
| Complement factor I                          | P05156     | CFAI_HUMAN  | CFI      | X | X |
| Apolipoprotein L1                            | O14791     | APOL1_HUMAN | APOL1    | X | X |
| Complement C4-B                              | P0C0L5     | CO4B_HUMAN  | C4B      | X | X |
| Immunoglobulin heavy constant gamma 4        | P01861     | IGHG4_HUMAN | IGHG4    | X | X |
| Apolipoprotein A-IV                          | P06727     | APOA4_HUMAN | APOA4    | X | X |
| Serum amyloid A-4 protein                    | P35542     | SAA4_HUMAN  | SAA4     | X | X |
| Selenoprotein P                              | P49908     | SEPP1_HUMAN | SELENOP  | X | X |
| Leucine-rich alpha-2-glycoprotein            | P02750     | A2GL_HUMAN  | LRG1     | X | X |
| Complement C5                                | P01031     | CO5_HUMAN   | C5       | X | X |
| Immunoglobulin kappa constant                | P01834     | IGKC_HUMAN  | IGKC     | X | X |

|                                                      |        |             |           |   |   |
|------------------------------------------------------|--------|-------------|-----------|---|---|
| Immunoglobulin kappa variable 1-16                   | P04430 | KV116_HUMAN | IGKV1-16  | X | X |
| Apolipoprotein A-II                                  | P02652 | APOA2_HUMAN | APOA2     | X | X |
| Galectin-3-binding protein                           | Q08380 | LG3BP_HUMAN | LGALS3BP  | X | X |
| Alpha-2-HS-glycoprotein                              | P02765 | FETUA_HUMAN | AHSG      | X | X |
| Beta-2-glycoprotein 1                                | P02749 | APOH_HUMAN  | APOH      | X | X |
| Protein Z-dependent protease inhibitor               | Q9UK55 | ZPI_HUMAN   | SERPINA10 | X | X |
| Complement C3                                        | P01024 | CO3_HUMAN   | C3        | X | X |
| Carboxypeptidase B2                                  | Q96IY4 | CBPB2_HUMAN | CPB2      | X | X |
| Apolipoprotein D                                     | P05090 | APOD_HUMAN  | APOD      | X | X |
| Alpha-1-acid glycoprotein 2                          | P19652 | A1AG2_HUMAN | ORM2      | X | X |
| Apolipoprotein M                                     | O95445 | APOM_HUMAN  | APOM      | X | X |
| Protein AMBP                                         | P02760 | AMBP_HUMAN  | AMBP      | X | X |
| Hemoglobin subunit alpha                             | P69905 | HBA_HUMAN   | HBA1      | X | X |
| Heparin cofactor 2                                   | P05546 | HEP2_HUMAN  | SERPIND1  | X | X |
| Apolipoprotein B-100                                 | P04114 | APOB_HUMAN  | APOB      | X | X |
| Corticosteroid-binding globulin                      | P08185 | CBG_HUMAN   | SERPINA6  | X | X |
| Immunoglobulin lambda variable 1-51                  | P01701 | LV151_HUMAN | IGLV1-51  | X | X |
| Haptoglobin-related protein                          | P00739 | HPTR_HUMAN  | HPR       | X | X |
| Prothrombin                                          | P00734 | THRB_HUMAN  | F2        | X | X |
| Phosphatidylinositol-glycan-specific phospholipase D | P80108 | PHLD_HUMAN  | GPLD1     | X | X |
| Histidine-rich glycoprotein                          | P04196 | HRG_HUMAN   | HRG       | X | X |



**Table S2.** Proteins identified in the serum samples pretreated with AuNPs (**method 2**) belonging to HER2-positive BC patients that were obtained before starting the neoadjuvant treatment. These patients showed different response after the NAT treatment: responders (n = 6), non-responders (n = 4). The accession number, gene name and species (Human) were reported.

| Protein Name                                                           | UniProt Name | Entry Name  | Gene     | Responders | Non-responders |
|------------------------------------------------------------------------|--------------|-------------|----------|------------|----------------|
| Angiotensinogen                                                        | P01019       | ANGT_HUMAN  | AGT      | X          |                |
| Ficolin-2                                                              | Q15485       | FCN2_HUMAN  | FCN2     | X          |                |
| Hemoglobin subunit beta                                                | P68871       | HBB_HUMAN   | HBB      | X          |                |
| Immunoglobulin lambda variable 1-47                                    | P01700       | LV147_HUMAN | IGLV1-47 | X          |                |
| Immunoglobulin J chain                                                 | P01591       | IGJ_HUMAN   | JCHAIN   | X          |                |
| Hemoglobin subunit alpha                                               | P69905       | HBA_HUMAN   | HBA1     | X          |                |
| Pregnancy zone protein                                                 | P20742       | PZP_HUMAN   | PZP      |            | X              |
| Complement component C8 gamma chain                                    | P07360       | CO8G_HUMAN  | C8G      |            | X              |
| Carboxypeptidase N catalytic chain                                     | P15169       | CBPN_HUMAN  | CPN1     |            | X              |
| C4b-binding protein beta chain                                         | P20851       | C4BPB_HUMAN | C4BPB    |            | X              |
| Complement C1s subcomponent                                            | P09871       | C1S_HUMAN   | C1S      |            | X              |
| Complement C1r subcomponent                                            | P00736       | C1R_HUMAN   | C1R      |            | X              |
| Mannan-binding lectin serine protease 1                                | P48740       | MASP1_HUMAN | MASP1    |            | X              |
| Coagulation factor XII                                                 | P00748       | FA12_HUMAN  | F12      |            | X              |
| Immunoglobulin lambda-like polypeptide 5                               | B9A064       | IGLL5_HUMAN | IGLL5    |            | X              |
| Extracellular matrix protein 1                                         | Q16610       | ECM1_HUMAN  | ECM1     |            | X              |
| Immunoglobulin kappa variable 4-1                                      | P06312       | KV401_HUMAN | IGKV4-1  |            | X              |
| Plasma kallikrein                                                      | P03952       | KLKB1_HUMAN | KLKB1    |            | X              |
| Hyaluronan-binding protein 2                                           | Q14520       | HABP2_HUMAN | HABP2    |            | X              |
| Complement component C8 beta chain                                     | P07358       | CO8B_HUMAN  | C8B      |            | X              |
| Complement C1q subcomponent subunit A                                  | P02745       | C1QA_HUMAN  | C1QA     |            | X              |
| Complement component C7                                                | P10643       | CO7_HUMAN   | C7       |            | X              |
| Vitamin K-dependent protein C                                          | P04070       | PROC_HUMAN  | PROC     |            | X              |
| Coagulation factor X                                                   | P00742       | FA10_HUMAN  | F10      |            | X              |
| CD5 antigen-like                                                       | O43866       | CD5L_HUMAN  | CD5L     |            | X              |
| Attractin                                                              | O75882       | ATRN_HUMAN  | ATRN     |            | X              |
| Complement component C8 alpha chain                                    | P07357       | CO8A_HUMAN  | C8A      |            | X              |
| Afamin                                                                 | P43652       | AFAM_HUMAN  | AFM      |            | X              |
| Insulin-like growth factor-binding protein complex acid labile subunit | P35858       | ALS_HUMAN   | IGFALS   |            | X              |
| Immunoglobulin heavy variable 3-7                                      | P01780       | HV307_HUMAN | IGHV3-7  |            | X              |
| Immunoglobulin kappa variable 3-11                                     | P04433       | KV311_HUMAN | IGKV3-11 |            | X              |
| Plasminogen                                                            | P00747       | PLMN_HUMAN  | PLG      |            | X              |
| Coagulation factor XIII B chain                                        | P05160       | F13B_HUMAN  | F13B     |            | X              |
| Ficolin-3                                                              | O75636       | FCN3_HUMAN  | FCN3     |            | X              |
| Complement factor H                                                    | P08603       | CFAH_HUMAN  | CFH      |            | X              |
| Sex hormone-binding globulin                                           | P04278       | SHBG_HUMAN  | SHBG     |            | X              |

|                                                      |        |             |          |   |   |
|------------------------------------------------------|--------|-------------|----------|---|---|
| Complement factor H-related protein 1                | Q03591 | FHR1_HUMAN  | CFHR1    |   | X |
| C4b-binding protein alpha chain                      | P04003 | C4BPA_HUMAN | C4BPA    |   | X |
| Complement component C9                              | P02748 | CO9_HUMAN   | C9       |   | X |
| Complement factor H-related protein 2                | P36980 | FHR2_HUMAN  | CFHR2    |   | X |
| Immunoglobulin lambda constant 3                     | P0DOY3 | IGLC3_HUMAN | IGLC3    |   | X |
| Complement factor I                                  | P05156 | CFAI_HUMAN  | CFI      |   | X |
| Complement C1r subcomponent-like protein             | Q9NZP8 | C1RL_HUMAN  | C1RL     |   | X |
| Selenoprotein P                                      | P49908 | SEPP1_HUMAN | SELENOP  |   | X |
| Complement C5                                        | P01031 | CO5_HUMAN   | C5       |   | X |
| Apolipoprotein A-II                                  | P02652 | APOA2_HUMAN | APOA2    |   | X |
| Apolipoprotein D                                     | P05090 | APOD_HUMAN  | APOD     |   | X |
| Keratin, type I cytoskeletal 9                       | P35527 | K1C9_HUMAN  | KRT9     |   | X |
| Prothrombin                                          | P00734 | THRB_HUMAN  | F2       |   | X |
| Phosphatidylinositol-glycan-specific phospholipase D | P80108 | PHLD_HUMAN  | GPLD1    |   | X |
| Fetuin-B                                             | Q9UGM5 | FETUB_HUMAN | FETUB    |   | X |
| Apolipoprotein C-III                                 | P02656 | APOC3_HUMAN | APOC3    | X | X |
| Serum paraoxonase/ arylesterase 1                    | P27169 | PON1_HUMAN  | PON1     | X | X |
| Immunoglobulin heavy constant gamma 1                | P01857 | IGHG1_HUMAN | IGHG1    | X | X |
| Inter-alpha-trypsin inhibitor heavy chain H3         | Q06033 | ITIH3_HUMAN | ITIH3    | X | X |
| Kininogen-1                                          | P01042 | KNG1_HUMAN  | KNG1     | X | X |
| Plasma protease C1 inhibitor                         | P05155 | IC1_HUMAN   | SERPING1 | X | X |
| Alpha-1B-glycoprotein                                | P04217 | A1BG_HUMAN  | A1BG     | X | X |
| Inter-alpha-trypsin inhibitor heavy chain H2         | P19823 | ITIH2_HUMAN | ITIH2    | X | X |
| Immunoglobulin heavy constant gamma 2                | P01859 | IGHG2_HUMAN | IGHG2    | X | X |
| Vitronectin                                          | P04004 | VTNC_HUMAN  | VTN      | X | X |
| Keratin, type II cytoskeletal 1                      | P04264 | K2C1_HUMAN  | KRT1     | X | X |
| Inter-alpha-trypsin inhibitor heavy chain H1         | P19827 | ITIH1_HUMAN | ITIH1    | X | X |
| Vitamin D-binding protein                            | P02774 | VTDB_HUMAN  | GC       | X | X |
| Complement C1q subcomponent subunit C                | P02747 | C1QC_HUMAN  | C1QC     | X | X |
| Ceruloplasmin                                        | P00450 | CERU_HUMAN  | CP       | X | X |
| Antithrombin-III                                     | P01008 | ANT3_HUMAN  | SERPINC1 | X | X |
| Apolipoprotein A-I                                   | P02647 | APOA1_HUMAN | APOA1    | X | X |
| Fibronectin                                          | P02751 | FINC_HUMAN  | FN1      | X | X |
| Complement C2                                        | P06681 | CO2_HUMAN   | C2       | X | X |
| Hemopexin                                            | P02790 | HEMO_HUMAN  | HPX      | X | X |
| Apolipoprotein E                                     | P02649 | APOE_HUMAN  | APOE     | X | X |
| Immunoglobulin heavy constant alpha 1                | P01876 | IGHA1_HUMAN | IGHA1    | X | X |
| N-acetylmuramoyl-L-alanine amidase                   | Q96PD5 | PGRP2_HUMAN | PGLYRP2  | X | X |
| Haptoglobin                                          | P00738 | HPT_HUMAN   | HPT      | X | X |
| Alpha-2-macroglobulin                                | P01023 | A2MG_HUMAN  | A2M      | X | X |
| Vitamin K-dependent protein S                        | P07225 | PROS_HUMAN  | PROS1    | X | X |

|                                              |        |             |          |   |   |
|----------------------------------------------|--------|-------------|----------|---|---|
| Gelsolin                                     | P06396 | GELS_HUMAN  | GSN      | X | X |
| Immunoglobulin heavy constant mu             | P01871 | IGHM_HUMAN  | IGHM     | X | X |
| Serotransferrin                              | P02787 | TRFE_HUMAN  | TF       | X | X |
| Clusterin                                    | P10909 | CLUS_HUMAN  | CLU      | X | X |
| Lumican                                      | P51884 | LUM_HUMAN   | LUM      | X | X |
| Alpha-2-antiplasmin                          | P08697 | A2AP_HUMAN  | SERPINF2 | X | X |
| Carboxypeptidase N subunit 2                 | P22792 | CPN2_HUMAN  | CPN2     | X | X |
| Alpha-1-antichymotrypsin                     | P01011 | AACT_HUMAN  | SERPINA3 | X | X |
| Albumin                                      | P02768 | ALBU_HUMAN  | ALB      | X | X |
| Complement factor B                          | P00751 | CFAB_HUMAN  | CFB      | X | X |
| Inter-alpha-trypsin inhibitor heavy chain H4 | Q14624 | ITIH4_HUMAN | ITIH4    | X | X |
| Complement C4-A                              | P0C0L4 | CO4A_HUMAN  | C4A      | X | X |
| Alpha-1-antitrypsin                          | P01009 | A1AT_HUMAN  | SERPINA1 | X | X |
| Retinol-binding protein 4                    | P02753 | RET4_HUMAN  | RBP4     | X | X |
| Complement C1q subcomponent subunit B        | P02746 | C1QB_HUMAN  | C1QB     | X | X |
| Apolipoprotein L1                            | O14791 | APOL1_HUMAN | APOL1    | X | X |
| Complement C4-B                              | P0C0L5 | CO4B_HUMAN  | C4B      | X | X |
| Apolipoprotein A-IV                          | P06727 | APOA4_HUMAN | APOA4    | X | X |
| Immunoglobulin kappa constant                | P01834 | IGKC_HUMAN  | IGKC     | X | X |
| Alpha-2-HS-glycoprotein                      | P02765 | FETUA_HUMAN | AHSG     | X | X |
| Beta-2-glycoprotein 1                        | P02749 | APOH_HUMAN  | APOH     | X | X |
| Complement C3                                | P01024 | CO3_HUMAN   | C3       | X | X |
| Apolipoprotein M                             | O95445 | APOM_HUMAN  | APOM     | X | X |
| Protein AMBP                                 | P02760 | AMBP_HUMAN  | AMBP     | X | X |
| Keratin, type I cytoskeletal 10              | P13645 | K1C10_HUMAN | KRT10    | X | X |
| Heparin cofactor 2                           | P05546 | HEP2_HUMAN  | SERPIND1 | X | X |
| Apolipoprotein B-100                         | P04114 | APOB_HUMAN  | APOB     | X | X |
| Haptoglobin-related protein                  | P00739 | HPTR_HUMAN  | HPR      | X | X |
| Histidine-rich glycoprotein                  | P04196 | HRG_HUMAN   | HRG      | X | X |

**Table S3.** Proteins identified in the serum samples pretreated with PtNPs (**method 3**) belonging to HER2-positive BC patients that were obtained before starting the neoadjuvant treatment. These patients showed different response after the NAT treatment: responders ( $n = 6$ ), non-responders ( $n = 4$ ). The accession number, gene name and species (Human) were reported.

| Protein Name                                 | UniProt Name | Entry Name  | Gene      | Responders | Non-responders |
|----------------------------------------------|--------------|-------------|-----------|------------|----------------|
| Apolipoprotein C-III                         | P02656       | APOC3_HUMAN | APOC3     | X          |                |
| Gelsolin                                     | P06396       | GELS_HUMAN  | GSN       | X          |                |
| Immunoglobulin kappa constant                | P01834       | IGKC_HUMAN  | IGKC      | X          |                |
| Apolipoprotein A-II                          | P02652       | APOA2_HUMAN | APOA2     | X          |                |
| Galectin-3-binding protein                   | Q08380       | LG3BP_HUMAN | LGALS3BP  | X          |                |
| Immunoglobulin kappa variable 2D-28          | P01615       | KVD28_HUMAN | IGKV2D-28 | X          |                |
| Plasminogen                                  | P00747       | PLMN_HUMAN  | PLG       |            | X              |
| Complement component C8 gamma chain          | P07360       | CO8G_HUMAN  | C8G       |            | X              |
| Complement factor H-related protein 1        | Q03591       | FHR1_HUMAN  | CFHR1     |            | X              |
| Immunoglobulin lambda-like polypeptide 5     | B9A064       | IGLL5_HUMAN | IGLL5     |            | X              |
| Alpha-1-antitrypsin                          | P01009       | A1AT_HUMAN  | SERPINA1  |            | X              |
| Keratin, type II cytoskeletal 1              | P04264       | K2C1_HUMAN  | KRT1      |            | X              |
| Complement component C8 beta chain           | P07358       | CO8B_HUMAN  | C8B       |            | X              |
| Carboxypeptidase B2                          | Q96IY4       | CBPB2_HUMAN | CPB2      |            | X              |
| Apolipoprotein D                             | P05090       | APOD_HUMAN  | APOD      |            | X              |
| Immunoglobulin J chain                       | P01591       | IGJ_HUMAN   | JCHAIN    |            | X              |
| Haptoglobin-related protein                  | P00739       | HPTR_HUMAN  | HPR       |            | X              |
| Serum paraoxonase/ arylesterase 1            | P27169       | PON1_HUMAN  | PON1      | X          | X              |
| Immunoglobulin heavy constant gamma 1        | P01857       | IGHG1_HUMAN | IGHG1     | X          | X              |
| Inter-alpha-trypsin inhibitor heavy chain H3 | Q06033       | ITIH3_HUMAN | ITIH3     | X          | X              |
| Carboxypeptidase N subunit 2                 | P22792       | CPN2_HUMAN  | CPN2      | X          | X              |
| Ficolin-3                                    | O75636       | FCN3_HUMAN  | FCN3      | X          | X              |
| Complement factor H                          | P08603       | CFAH_HUMAN  | CFH       | X          | X              |
| Kininogen-1                                  | P01042       | KNG1_HUMAN  | KNG1      | X          | X              |
| Plasma protease C1 inhibitor                 | P05155       | IC1_HUMAN   | SERPING1  | X          | X              |
| Albumin                                      | P02768       | ALBU_HUMAN  | ALB       | X          | X              |
| Inter-alpha-trypsin inhibitor heavy chain H2 | P19823       | ITIH2_HUMAN | ITIH2     | X          | X              |
| Complement factor B                          | P00751       | CFAB_HUMAN  | CFB       | X          | X              |
| Inter-alpha-trypsin inhibitor heavy chain H4 | Q14624       | ITIH4_HUMAN | ITIH4     | X          | X              |
| Vitronectin                                  | P04004       | VTNC_HUMAN  | VTN       | X          | X              |
| Retinol-binding protein 4                    | P02753       | RET4_HUMAN  | RBP4      | X          | X              |
| Complement C1q subcomponent subunit B        | P02746       | C1QB_HUMAN  | C1QB      | X          | X              |
| Inter-alpha-trypsin inhibitor heavy chain H1 | P19827       | ITIH1_HUMAN | ITIH1     | X          | X              |



|                                       |        |             |          |   |   |
|---------------------------------------|--------|-------------|----------|---|---|
| Vitamin D-binding protein             | P02774 | VTDB_HUMAN  | GC       | X | X |
| C4b-binding protein alpha chain       | P04003 | C4BPA_HUMAN | C4BPA    | X | X |
| Complement C1q subcomponent subunit C | P02747 | C1QC_HUMAN  | C1QC     | X | X |
| Complement component C9               | P02748 | CO9_HUMAN   | C9       | X | X |
| Immunoglobulin kappa variable 3-20    | P01619 | KV320_HUMAN | IGKV3-20 | X | X |
| Antithrombin-III                      | P01008 | ANT3_HUMAN  | SERPINC1 | X | X |
| Complement factor I                   | P05156 | CFAI_HUMAN  | CFI      | X | X |
| Apolipoprotein A-I                    | P02647 | APOA1_HUMAN | APOA1    | X | X |
| Fibronectin                           | P02751 | FINC_HUMAN  | FN1      | X | X |
| Complement C4-B                       | P0C0L5 | CO4B_HUMAN  | C4B      | X | X |
| Complement C2                         | P06681 | CO2_HUMAN   | C2       | X | X |
| Apolipoprotein A-IV                   | P06727 | APOA4_HUMAN | APOA4    | X | X |
| Hemopexin                             | P02790 | HEMO_HUMAN  | HPX      | X | X |
| Complement C5                         | P01031 | CO5_HUMAN   | C5       | X | X |
| Apolipoprotein E                      | P02649 | APOE_HUMAN  | APOE     | X | X |
| Beta-2-glycoprotein 1                 | P02749 | APOH_HUMAN  | APOH     | X | X |
| Alpha-2-HS-glycoprotein               | P02765 | FETUA_HUMAN | AHSG     | X | X |
| Immunoglobulin heavy constant alpha 1 | P01876 | IGHA1_HUMAN | IGHA1    | X | X |
| Complement C3                         | P01024 | CO3_HUMAN   | C3       | X | X |
| N-acetylmuramoyl-L-alanine amidase    | Q96PD5 | PGRP2_HUMAN | PGLYRP2  | X | X |
| Haptoglobin                           | P00738 | HPT_HUMAN   | HPT      | X | X |
| Alpha-2-macroglobulin                 | P01023 | A2MG_HUMAN  | A2M      | X | X |
| Apolipoprotein M                      | O95445 | APOM_HUMAN  | APOM     | X | X |
| CD5 antigen-like                      | O43866 | CD5L_HUMAN  | CD5L     | X | X |
| Protein AMBP                          | P02760 | AMBP_HUMAN  | AMBP     | X | X |
| Vitamin K-dependent protein S         | P07225 | PROS_HUMAN  | PROS1    | X | X |
| Immunoglobulin heavy constant mu      | P01871 | IGHM_HUMAN  | IGHM     | X | X |
| Afamin                                | P43652 | AFAM_HUMAN  | AFM      | X | X |
| Apolipoprotein B-100                  | P04114 | APOB_HUMAN  | APOB     | X | X |
| Serotransferrin                       | P02787 | TRFE_HUMAN  | TF       | X | X |
| Clusterin                             | P10909 | CLUS_HUMAN  | CLU      | X | X |
| Prothrombin                           | P00734 | THRB_HUMAN  | F2       | X | X |
| Histidine-rich glycoprotein           | P04196 | HRG_HUMAN   | HRG      | X | X |
| Alpha-2-antiplasmin                   | P08697 | A2AP_HUMAN  | SERPINF2 | X | X |

**Table S4.** List of 43 common proteins identified in the serum of responders pretreated by the three different methods (with and without NPs). The accession number, gene name and species (Human) were reported.

| Protein Name                                 | UniProt Name | Entry Name  | Gene     |
|----------------------------------------------|--------------|-------------|----------|
| Apolipoprotein C-III                         | P02656       | APOC3_HUMAN | APOC3    |
| Serum paraoxonase/ arylesterase 1            | P27169       | PON1_HUMAN  | PON1     |
| Immunoglobulin heavy constant gamma 1        | P01857       | IGHG1_HUMAN | IGHG1    |
| Inter-alpha-trypsin inhibitor heavy chain H3 | Q06033       | ITIH3_HUMAN | ITIH3    |
| Kininogen-1                                  | P01042       | KNG1_HUMAN  | KNG1     |
| Plasma protease C1 inhibitor                 | P05155       | IC1_HUMAN   | SERPINC1 |
| Inter-alpha-trypsin inhibitor heavy chain H2 | P19823       | ITIH2_HUMAN | ITIH2    |
| Vitronectin                                  | P04004       | VTNC_HUMAN  | VTN      |
| Vitamin D-binding protein                    | P02774       | VTDB_HUMAN  | GC       |
| Inter-alpha-trypsin inhibitor heavy chain H1 | P19827       | ITIH1_HUMAN | ITIH1    |
| Complement C1q subcomponent subunit C        | P02747       | C1QC_HUMAN  | C1QC     |
| Antithrombin-III                             | P01008       | ANT3_HUMAN  | SERPINC1 |
| Fibronectin                                  | P02751       | FINC_HUMAN  | FN1      |
| Apolipoprotein A-I                           | P02647       | APOA1_HUMAN | APOA1    |
| Complement C2                                | P06681       | CO2_HUMAN   | C2       |
| Hemopexin                                    | P02790       | HEMO_HUMAN  | HPX      |
| Apolipoprotein E                             | P02649       | APOE_HUMAN  | APOE     |
| Immunoglobulin heavy constant alpha 1        | P01876       | IGHA1_HUMAN | IGHA1    |
| N-acetylmuramoyl-L-alanine amidase           | Q96PD5       | PGRP2_HUMAN | PGLYRP2  |
| Haptoglobin                                  | P00738       | HPT_HUMAN   | HPT      |
| Alpha-2-macroglobulin                        | P01023       | A2MG_HUMAN  | A2M      |
| Vitamin K-dependent protein S                | P07225       | PROS_HUMAN  | PROS1    |
| Gelsolin                                     | P06396       | GELS_HUMAN  | GSN      |
| Immunoglobulin heavy constant mu             | P01871       | IGHM_HUMAN  | IGHM     |
| Serotransferrin                              | P02787       | TRFE_HUMAN  | TF       |
| Clusterin                                    | P10909       | CLUS_HUMAN  | CLU      |
| Alpha-2-antiplasmin                          | P08697       | A2AP_HUMAN  | SERPINF2 |
| Carboxypeptidase N subunit 2                 | P22792       | CPN2_HUMAN  | CPN2     |
| Albumin                                      | P02768       | ALBU_HUMAN  | ALB      |
| Complement factor B                          | P00751       | CFAB_HUMAN  | CFB      |
| Inter-alpha-trypsin inhibitor heavy chain H4 | Q14624       | ITIH4_HUMAN | ITIH4    |
| Retinol-binding protein 4                    | P02753       | RET4_HUMAN  | RBP4     |
| Complement C1q subcomponent subunit B        | P02746       | C1QB_HUMAN  | C1QB     |
| Complement C4-B                              | P0C0L5       | CO4B_HUMAN  | C4B      |
| Apolipoprotein A-IV                          | P06727       | APOA4_HUMAN | APOA4    |
| Immunoglobulin kappa constant                | P01834       | IGKC_HUMAN  | IGKC     |
| Alpha-2-HS-glycoprotein                      | P02765       | FETUA_HUMAN | AHSG     |
| Beta-2-glycoprotein 1                        | P02749       | APOH_HUMAN  | APOH     |
| Complement C3                                | P01024       | CO3_HUMAN   | C3       |
| Apolipoprotein M                             | O95445       | APOM_HUMAN  | APOM     |
| Protein AMBP                                 | P02760       | AMBP_HUMAN  | AMBP     |
| Apolipoprotein B-100                         | P04114       | APOB_HUMAN  | APOB     |
| Histidine-rich glycoprotein                  | P04196       | HRG_HUMAN   | HRG      |

**Table S5.** List of 54 common proteins identified in the serum of non-responders pretreated by the three different methods (with and without NPs). The accession number, gene name and species (Human) were reported.

| Protein Name                                 | UniProt Name | Entry Name  | Gene     |
|----------------------------------------------|--------------|-------------|----------|
| Serum paraoxonase/ arylesterase 1            | P27169       | PON1_HUMAN  | PON1     |
| Immunoglobulin heavy constant gamma 1        | P01857       | IGHG1_HUMAN | IGHG1    |
| Inter-alpha-trypsin inhibitor heavy chain H3 | Q06033       | ITIH3_HUMAN | ITIH3    |
| Kininogen-1                                  | P01042       | KNG1_HUMAN  | KNG1     |
| cPlasma protease C1 inhibitor                | P05155       | IC1_HUMAN   | SERPINC1 |

|                                              |        |             |          |
|----------------------------------------------|--------|-------------|----------|
| Inter-alpha-trypsin inhibitor heavy chain H2 | P19823 | ITIH2_HUMAN | ITIH2    |
| Vitronectin                                  | P04004 | VTNC_HUMAN  | VTN      |
| Immunoglobulin lambda-like polypeptide 5     | B9A064 | IGLL5_HUMAN | IGLL5    |
| Inter-alpha-trypsin inhibitor heavy chain H1 | P19827 | ITIH1_HUMAN | ITIH1    |
| Vitamin D-binding protein                    | P02774 | VTDB_HUMAN  | GC       |
| Complement C1q subcomponent subunit C        | P02747 | C1QC_HUMAN  | C1QC     |
| Antithrombin-III                             | P01008 | ANT3_HUMAN  | SERPINC1 |
| Apolipoprotein A-I                           | P02647 | APOA1_HUMAN | APOA1    |
| Fibronectin                                  | P02751 | FINC_HUMAN  | FN1      |
| Complement C2                                | P06681 | CO2_HUMAN   | C2       |
| Hemopexin                                    | P02790 | HEMO_HUMAN  | HPX      |
| Apolipoprotein E                             | P02649 | APOE_HUMAN  | APOE     |
| Immunoglobulin heavy constant alpha 1        | P01876 | IGHA1_HUMAN | IGHA1    |
| N-acetylmuramoyl-L-alanine amidase           | Q96PD5 | PGRP2_HUMAN | PGLYRP2  |
| Haptoglobin                                  | P00738 | HPT_HUMAN   | HPT      |
| Alpha-2-macroglobulin                        | P01023 | A2MG_HUMAN  | A2M      |
| CD5 antigen-like                             | O43866 | CD5L_HUMAN  | CD5L     |
| Vitamin K-dependent protein S                | P07225 | PROS_HUMAN  | PROS1    |
| Immunoglobulin heavy constant mu             | P01871 | IGHM_HUMAN  | IGHM     |
| Afamin                                       | P43652 | AFAM_HUMAN  | AFM      |
| Serotransferrin                              | P02787 | TRFE_HUMAN  | TF       |
| Clusterin                                    | P10909 | CLUS_HUMAN  | CLU      |
| Alpha-2-antiplasmin                          | P08697 | A2AP_HUMAN  | SERPINF2 |
| Plasminogen                                  | P00747 | PLMN_HUMAN  | PLG      |
| Carboxypeptidase N subunit 2                 | P22792 | CPN2_HUMAN  | CPN2     |
| Ficolin-3                                    | O75636 | FCN3_HUMAN  | FCN3     |
| Complement factor H                          | P08603 | CFAH_HUMAN  | CFH      |
| Albumin                                      | P02768 | ALBU_HUMAN  | ALB      |
| Complement factor H-related protein 1        | Q03591 | FHR1_HUMAN  | CFHR1    |
| Complement factor B                          | P00751 | CFAB_HUMAN  | CFB      |
| Inter-alpha-trypsin inhibitor heavy chain H4 | Q14624 | ITIH4_HUMAN | ITIH4    |
| Alpha-1-antitrypsin                          | P01009 | A1AT_HUMAN  | SERPINA1 |
| Retinol-binding protein 4                    | P02753 | RET4_HUMAN  | RBP4     |
| Complement C1q subcomponent subunit B        | P02746 | C1QB_HUMAN  | C1QB     |
| C4b-binding protein alpha chain              | P04003 | C4BPA_HUMAN | C4BPA    |
| Complement factor I                          | P05156 | CFAI_HUMAN  | CFI      |
| Complement C4-B                              | P0C0L5 | CO4B_HUMAN  | C4B      |
| Apolipoprotein A-IV                          | P06727 | APOA4_HUMAN | APOA4    |
| Complement C5                                | P01031 | CO5_HUMAN   | C5       |
| Alpha-2-HS-glycoprotein                      | P02765 | FETUA_HUMAN | AHSG     |
| Beta-2-glycoprotein 1                        | P02749 | APOH_HUMAN  | APOH     |
| Complement C3                                | P01024 | CO3_HUMAN   | C3       |
| Apolipoprotein D                             | P05090 | APOD_HUMAN  | APOD     |
| Apolipoprotein M                             | O95445 | APOM_HUMAN  | APOM     |
| Protein AMBP                                 | P02760 | AMBP_HUMAN  | AMBP     |
| Apolipoprotein B-100                         | P04114 | APOB_HUMAN  | APOB     |
| Haptoglobin-related protein                  | P00739 | HPTR_HUMAN  | HPR      |
| Prothrombin                                  | P00734 | THRB_HUMAN  | F2       |
| Histidine-rich glycoprotein                  | P04196 | HRG_HUMAN   | HRG      |

**Table S6.** List of the upregulated and downregulated proteins (a fold change  $\geq 1.5$  and  $P < 0.05$ ) found after the TMT labeling-based quantitative proteomic analysis of 6 serum samples from primary HER2-positive breast cancer cases, including 3 trastuzumab-based therapy-resistant and 3 trastuzumab-based therapy responsive cases developed by T. Yang et al. [46].

| Uniprot Code | Gene name | Protein Name                                 | <i>p</i> -Value | Response to NAC |
|--------------|-----------|----------------------------------------------|-----------------|-----------------|
| P04114       | APOB      | Apolipoprotein B-100                         | 0.0019          | ↑ Responders    |
| Q14624       | ITH4      | Inter-alpha-trypsin inhibitor heavy chain H4 | 0.0196          | ↑ Responders    |
| P06727       | APOA4     | Apolipoprotein A-IV                          | 0.0047          | ↓ Responders    |
| P02748       | C9        | Complement component C9                      | 0.0053          | ↑ Responders    |
| Q06033       | ITIH3     | Inter-alpha-trypsin inhibitor heavy chain H3 | 0.0439          | ↑ Responders    |
| P48740       | MASP1     | Mannan-binding lectin serine protease 1      | 0.0128          | ↑ Responders    |
| P08571       | CD14      | Monocyte differentiation antigen CD14        | 0.0021          | ↑ Responders    |
| P13796       | LCP1      | Plastin-2                                    | 0.0042          | ↑ Responders    |
| P01034       | CST3      | Cystatin-C                                   | 0.0010          | ↑ Responders    |
| P18428       | LBP       | Lipopolysaccharide-binding protein           | 0.0183          | ↑ Responders    |
| P07195       | LDHB      | L-lactate dehydrogenase B chain              | 0.0325          | ↓ Responders    |
| O00187       | MASP2     | Mannan-binding lectin serine protease 2      | 0.0146          | ↑ Responders    |
| P00338       | LDHA      | L-lactate dehydrogenase A chain              | 0.0179          | ↓ Responders    |
| P10124       | SRGN      | Serglycin                                    | 0.0013          | ↑ Responders    |
| P08195       | SLC3A2    | 4F2 cell-surface antigen heavy chain         | 0.0002          | ↑ Responders    |
| Q8NFT6       | DBF4B     | Protein DBF4 homolog B                       | 0.0059          | ↑ Responders    |
| P11766       | ADH5      | Alcohol dehydrogenase class-3                | 0.0208          | ↓ Responders    |
| P13693       | TPT1      | Translationally-controlled tumor protein     | 0.0430          | ↓ Responders    |
